# Supplementary material for: Molecular characterization of metastatic exon 11 mutant gastrointestinal stromal tumors (GIST) beyond KIT/PDGFRα genotype evaluated by next generation sequencing (NGS)
Source: PubMed Central journal article supplement (PMC4747222; doi:10.18632/oncotarget.6278), 2015-11-02
Supplement: oncotarget-06-42243-s001.pdf [file oncotarget-06-42243-s001.pdf]

**Molecular characterization of metastatic exon 11 mutant gastrointestinal stromal tumors (GIST) beyond KIT/PDGFR $\alpha$  genotype evaluated by next generation sequencing (NGS)**

Supplementary Material

**A.**

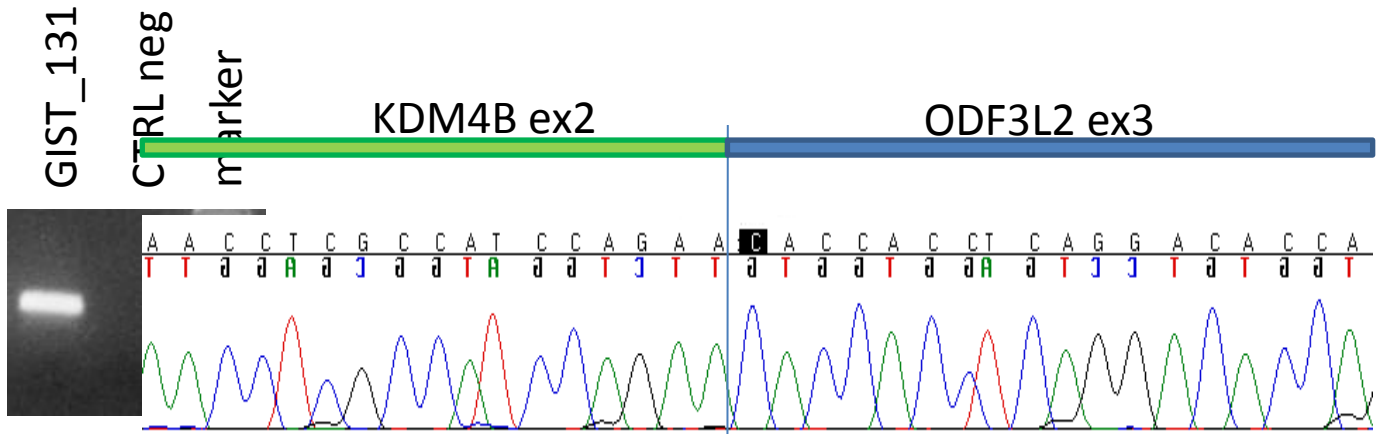

KDM4B-ODF3L2 fusion transcript detected in GIST\_131

**B.**

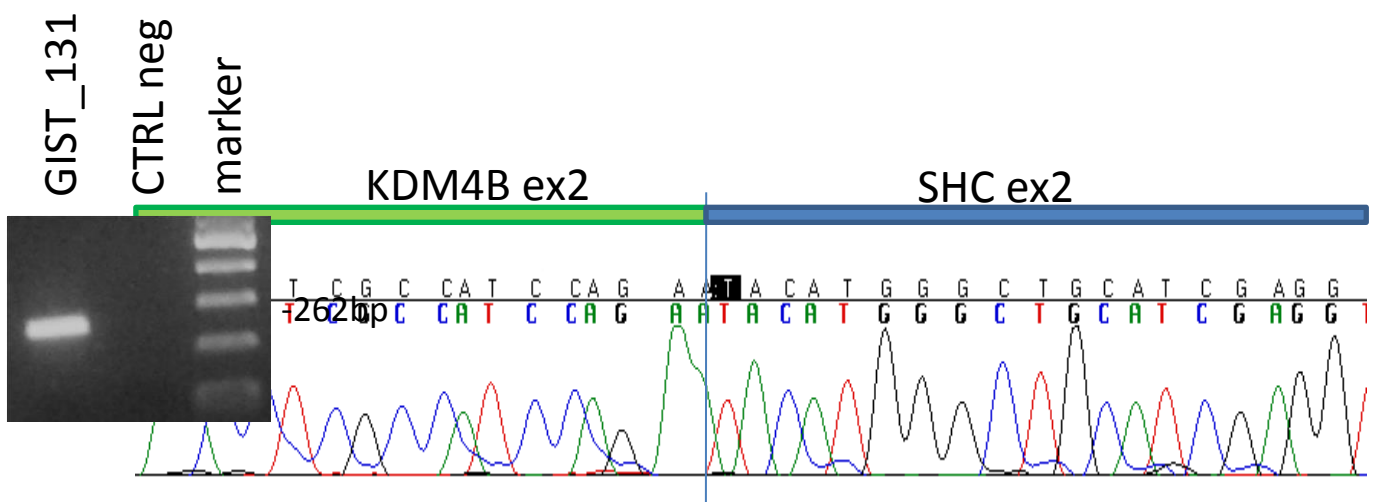

KDM4B-SHC2 fusion transcript detected in GIST\_131

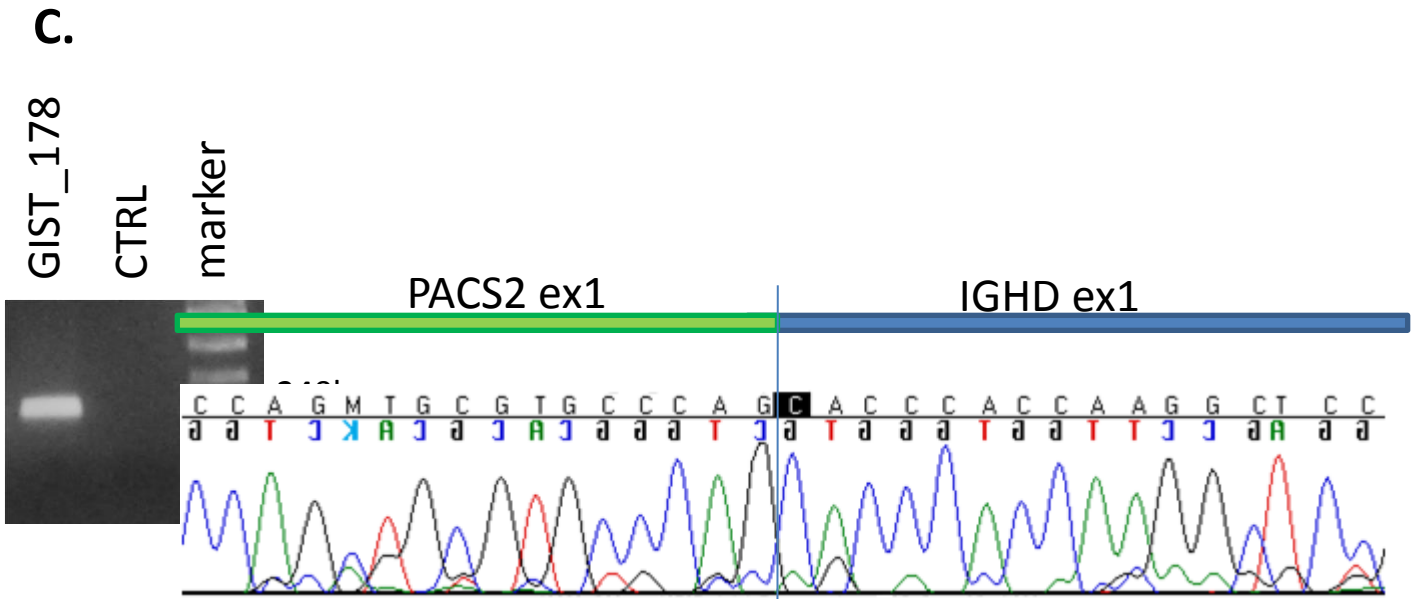

PACS2-IGHD fusion transcript detected in GIST\_178

**D.**

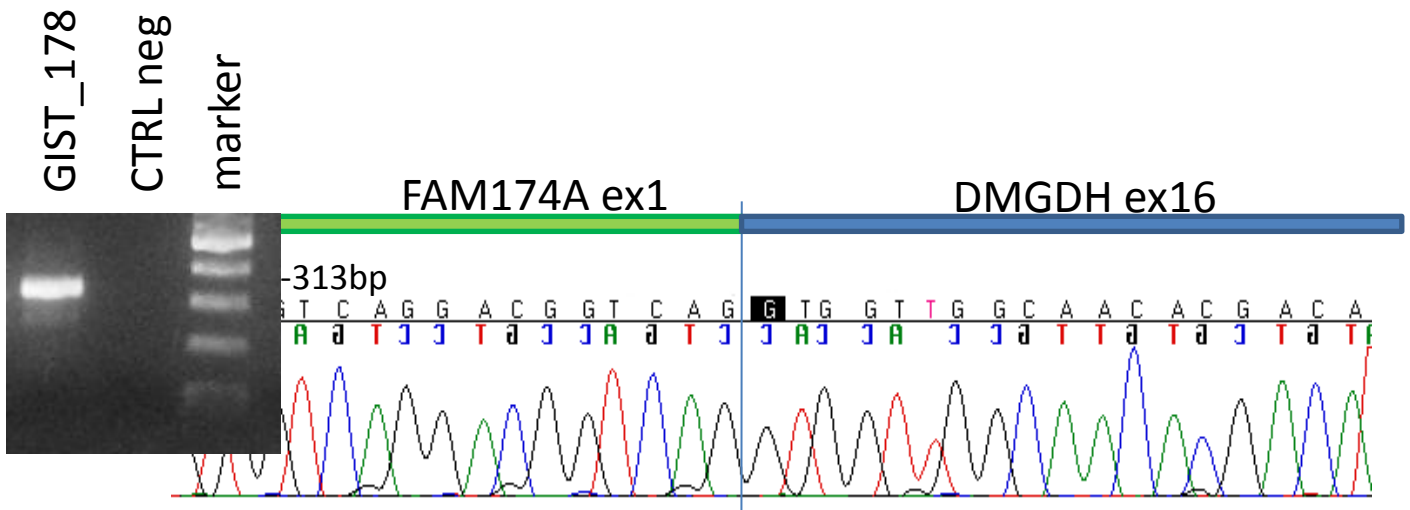

FAM174A-DMGDH fusion transcript detected in GIST\_178

**E.**

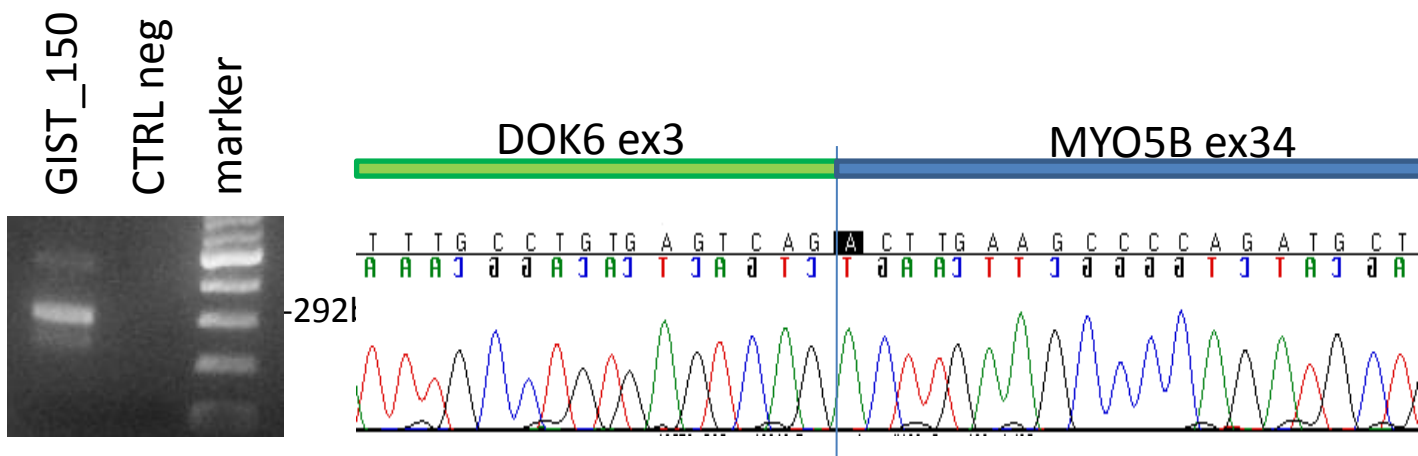

DOK6-MYO5B fusion transcript detected in GIST\_150

**F.**

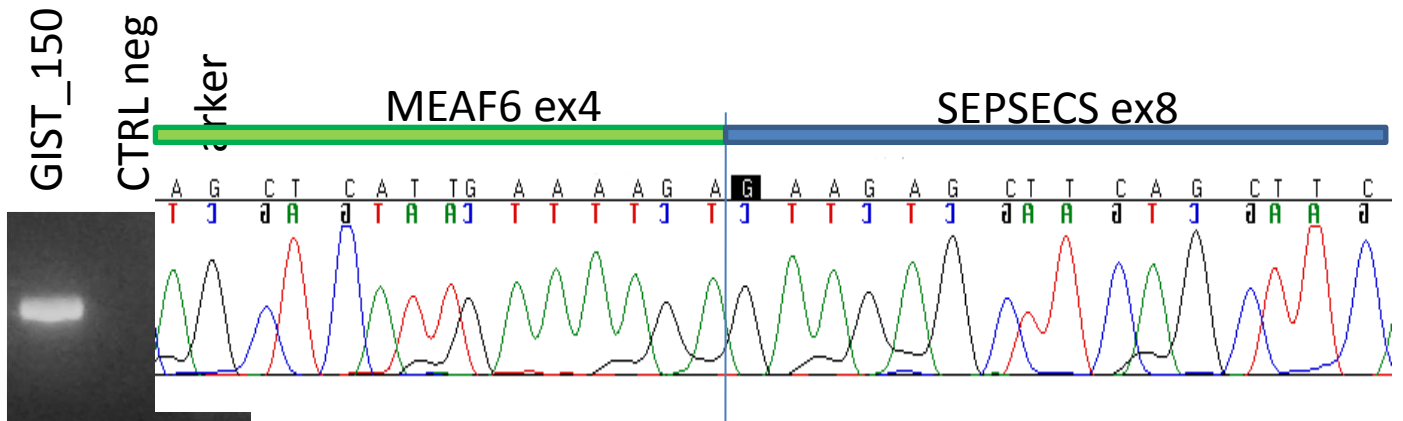

MEAF6-SEPSECS fusion transcript detected in GIST\_150

**Figure S1.** Validation with RT-PCR and Sanger Sequencing of the seven fusion transcripts detected by RNA-sequencing.

Chr1

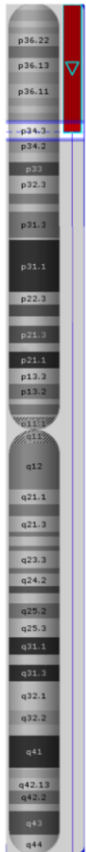

Chr4

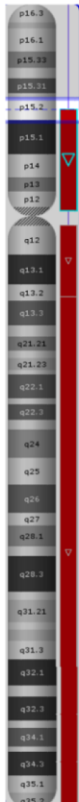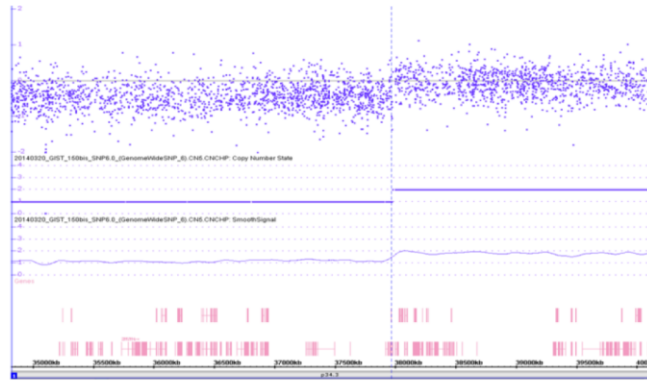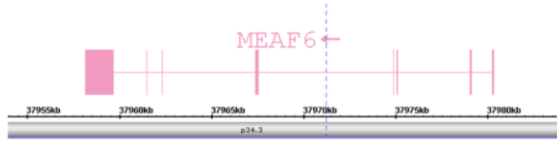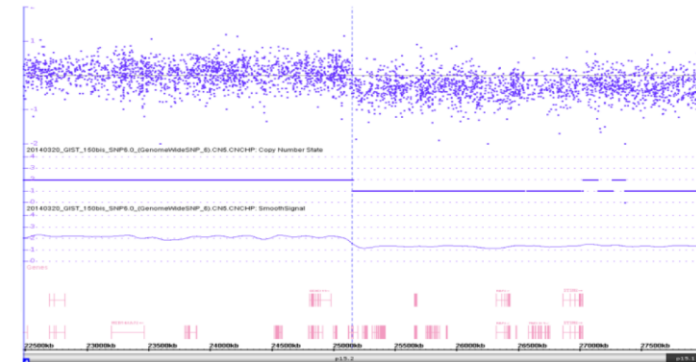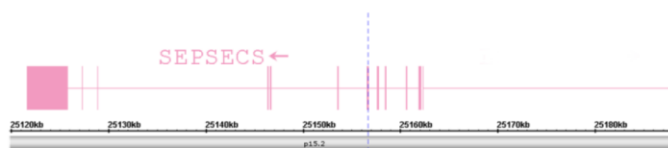

**Figure S2.**

Copy number variation analysis performed on chromosome 1 and 4 of GIST\_150. The loss of the region between p36.22 and p34.3 of chromosome 1 and the loss of the region between p15.2 and q35.2 of chromosome 4 indicated the presence of the unbalanced translocation  $t(1;4)(p34.3;p15.2)$ . This translocation was supported by the detection of MEAF6-SEPSECS chimeric transcript with RNA-seq (showed

in supplementary figure 1F). Both genes are encoded from the minus strand and are located in the breakpoint regions of this translocation.

**Table S1.** Copy number variations and mutational landscape of the most significant genes, detected by SNP-array and WTS respectively.
